# Supplementary material for: Dissecting the Illegal Ivory Trade: An Analysis of Ivory Seizures Data
Source: PLoS One. 2013 Oct 18;8(10):e76539. doi: 10.1371/journal.pone.0076539 (PMC3799824; doi:10.1371/journal.pone.0076539)
Supplement: Data File S1 — This file contains both the number of seizures for each ivory class for each country from 1996–2011 (summarised in Table S1) and the covariates: CITES legislation score, data collection score, LE ratio, CITES reporting score. All other covariates used in the analysis are already in the public domain. These data were used for the main analysis in this paper. (XLSX) [file pone.0076539.s007.xlsx]

## Sheet: alldata
ctry	year	sz.r1	sz.r2	sz.r3	sz.w1	sz.w2	sz.w3	legis	dc	LE1	rep.score
ae	1996	0	0	0	0	0	0	3	0	0	0.251314
ao	1996	0	0	0	0	0	0	3	0	0	-1.09861
at	1996	0	0	0	0	0	0	1	0	0	2.26868
au	1996	8	1	0	14	0	0	1	1	0	2.61496
be	1996	10	0	0	50	1	0	1	0.157895	0.947368	2.12026
bi	1996	0	0	0	0	0	0	3	0	0	-0.619039
bj	1996	0	0	0	0	0	0	2	0	0	-0.747214
bw	1996	1	0	0	0	0	0	2	1	1	1.5506
ca	1996	0	1	0	0	0	0	1	0	0	2.10413
cd	1996	0	0	0	0	0	0	3	0	0	0.659246
cf	1996	0	0	0	0	0	0	3	0	0	-0.111226
cg	1996	0	0	0	0	0	0	2	0	0	1.18958
ch	1996	0	1	0	4	0	0	1	0.8	1	2.66259
ci	1996	0	0	0	0	0	0	3	0	0	-1.60944
cm	1996	0	0	0	0	0	0	2	0	0	1.02165
cn	1996	0	0	1	2	0	0	2	0.666667	0.0344828	2.33537
de	1996	1	2	0	38	1	0	1	1	0	2.61496
dj	1996	0	0	0	0	0	0	3	0	0	-2.3979
dk	1996	0	0	0	1	0	0	1	1	1	2.56495
eg	1996	0	0	0	0	0	0	3	0	0	-2.51231
es	1996	4	0	0	32	0	0	2	1	0.705882	1.94591
et	1996	1	3	0	1	0	0	1	1	0.3125	0.955511
fr	1996	0	0	0	0	0	0	1	0	0.142857	2.51231
ga	1996	0	0	1	0	0	0	3	0	0	0.955511
gb	1996	6	1	0	49	1	0	1	0	0.4	2.61496
gh	1996	0	0	0	0	0	0	3	0	0	1.35812
gn	1996	0	0	0	0	0	0	2	0	0	0.479573
gq	1996	0	0	0	0	0	0	2	0	0	-1.09861
hk	1996	0	1	1	6	6	1	1	1	0.407407	2.05412
id	1996	0	0	0	0	0	0	3	0	0	1.88707
in	1996	1	4	2	3	1	0	2	0	0.4	2.61496
it	1996	0	0	0	0	0	0	1	0	0.285714	2.45674
jp	1996	2	3	0	32	1	1	2	0.871795	0.882353	1.82455
ke	1996	3	5	0	0	0	0	2	1	0.888889	0.427444
kh	1996	0	0	0	0	0	0	3	0	0	-1.09861
kp	1996	0	0	0	0	0	0	3	0	0	-1.09861
kr	1996	0	0	0	0	0	0	1	0	0.25	0
la	1996	0	0	0	0	0	0	3	0	0	-1.09861
ml	1996	0	0	0	0	0	0	3	0	0	0.510826
mo	1996	0	0	0	1	0	0	2	1	0.75	0.479573
mw	1996	0	2	0	0	0	0	2	1	0.9	1.27297
mx	1996	0	0	0	1	0	0	3	1	0	0.587787
my	1996	0	0	0	0	0	0	3	0	0	1.5506
mz	1996	0	0	0	0	0	0	3	0	0	1.02165
na	1996	24	26	0	0	0	0	2	0.54	1	0.587787
ng	1996	0	0	0	0	0	0	2	0	0	-0.725937
nl	1996	0	2	2	0	0	0	1	0.5	0	1.52606
nz	1996	2	0	0	6	0	0	1	0	0	2.83321
ph	1996	0	0	1	0	0	0	3	1	0	1.34993
pl	1996	0	0	0	0	0	0	3	0	0	0.788457
pt	1996	0	0	0	0	0	0	1	0	0	0.479573
qa	1996	0	0	0	0	0	0	3	0	0	-1.09861
ru	1996	0	0	0	0	0	0	2	0	0	0.336472
rw	1996	0	0	0	0	0	0	3	0	0	-1.34993
sd	1996	0	0	0	0	0	0	2	0	0	0
sg	1996	0	0	0	0	0	0	2	0	0.25	1.84583
sn	1996	0	0	0	0	0	0	3	0	0	1.29928
td	1996	0	0	0	0	0	0	3	0	0	0.955511
tg	1996	0	0	0	0	0	0	2	0	0	1.17007
th	1996	0	3	1	0	0	0	2	0.25	0.217391	0.546544
tw	1996	0	1	2	5	4	1	3	0.2	0.555556	-1.09861
tz	1996	3	9	5	0	2	0	2	0.684211	0.733333	1.42139
ug	1996	0	0	0	0	0	0	3	0	1	0
us	1996	14	2	0	146	1	0	1	1	0.96988	1.71765
vn	1996	0	0	0	0	0	0	3	0	0	0.510826
za	1996	6	2	0	18	0	0	2	0.961538	0.592593	2.66259
zm	1996	1	1	1	0	0	0	2	0	1	0.236389
zw	1996	9	3	0	0	0	0	2	1	0.73913	1.02165
ae	1997	0	0	0	0	0	0	3	0	0	0
ao	1997	0	0	0	0	0	0	3	0	0	-1.09861
at	1997	2	0	0	3	0	0	1	1	0	2.33537
au	1997	15	1	0	43	0	0	1	1	1	2.10413
be	1997	6	2	0	11	4	0	1	0.875	0.966102	2.19722
bi	1997	0	0	0	0	0	0	3	0	0	-0.76214
bj	1997	0	0	0	0	0	0	2	0	0	-0.847298
bw	1997	0	0	0	0	0	0	2	0	1	1.60944
ca	1997	0	0	0	0	0	0	1	0	0.166667	2.70805
cd	1997	0	0	0	0	0	0	3	0	0	0.534082
cf	1997	0	0	1	0	0	0	3	0	0	0
cg	1997	0	0	0	0	0	0	2	0	0	2.26868
ch	1997	28	2	0	34	3	0	1	0.98	0.714286	2.15176
ci	1997	0	0	0	0	0	0	3	0	0	-1.94591
cm	1997	0	0	0	0	0	0	2	0	0	0.820981
cn	1997	0	0	0	0	0	0	2	0	0.0612245	2.3979
de	1997	5	1	0	45	0	0	1	1	0.933333	2.66259
dj	1997	0	0	0	0	0	0	3	0	0	-2.56495
dk	1997	0	0	0	1	0	0	1	1	1	2.61496
eg	1997	0	0	0	0	0	0	3	0	0	-2.56495
es	1997	1	0	0	4	0	0	2	1	0.765957	2.03688
et	1997	1	3	0	0	0	0	1	1	0.357143	1.09861
fr	1997	1	0	0	0	0	0	1	0	0	2.00148
ga	1997	0	0	0	0	0	0	3	0	0.5	1.09861
gb	1997	0	0	1	6	0	0	1	0	0.77027	2.66259
gh	1997	0	0	0	0	0	0	3	0	0	1.15745
gn	1997	0	0	0	0	0	0	2	0	0	0.336472
gq	1997	0	0	0	0	0	0	2	0	0	-1.29928
hk	1997	4	1	0	2	0	0	1	0.875	0.378378	1.71765
id	1997	0	0	0	0	0	0	3	0	0	1.94591
in	1997	4	2	2	3	0	0	2	0	0.578947	2.66259
it	1997	0	0	0	4	0	0	1	0	0	2.51231
jp	1997	0	1	0	20	1	0	1	0.956522	0.77551	1.88707
ke	1997	4	1	0	1	0	0	2	0.833333	0.8	0.302281
kh	1997	0	0	0	0	0	0	3	0	0	-1.09861
kp	1997	0	0	0	0	0	0	3	0	0	-1.09861
kr	1997	0	0	1	0	1	0	1	0	0	0.336472
la	1997	0	0	0	0	0	0	3	0	0	-1.09861
ml	1997	0	0	0	0	0	0	3	0	0	2.19722
mo	1997	0	0	0	0	0	0	2	0	1	0.570545
mw	1997	0	1	0	0	0	0	2	1	0.666667	1.34993
mx	1997	0	0	0	1	0	0	1	1	0.333333	0.788457
my	1997	0	0	0	0	0	0	3	0	0	1.29928
mz	1997	0	0	0	0	0	0	3	0	0	1.09861
na	1997	27	28	1	2	0	0	2	0.482759	0.877193	0.788457
ng	1997	0	0	0	0	0	0	2	0	0	-0.422857
nl	1997	0	0	0	0	1	0	1	0	0.8	1.60944
nz	1997	0	0	0	0	0	0	1	0	0.888889	1.7346
ph	1997	0	1	1	0	0	0	3	1	0.25	1.42139
pl	1997	0	0	0	0	0	0	3	0	0	0.955511
pt	1997	0	0	0	0	0	0	1	0	0	0.570545
qa	1997	0	0	0	0	0	0	3	0	0	-1.09861
ru	1997	0	0	0	0	0	0	2	0	0	0.587787
rw	1997	0	0	0	0	0	0	3	0	0	-1.42139
sd	1997	0	0	0	0	0	0	2	0	0	0.125163
sg	1997	0	0	0	0	0	0	2	0	0	1.94591
sn	1997	0	0	0	0	0	0	2	0	0	1.35812
td	1997	0	0	0	0	0	0	3	0	0	0.619039
tg	1997	0	0	0	0	0	0	2	0	0	1.23676
th	1997	0	0	0	0	1	0	2	1	0.16	0.646627
tw	1997	2	1	0	8	0	1	3	0.636364	0.625	-1.09861
tz	1997	3	10	3	1	0	0	2	0.764706	0.904762	1.48808
ug	1997	0	0	0	0	1	0	3	0	0	0.251314
us	1997	16	1	0	121	0	0	1	1	0.947059	1.76766
vn	1997	0	0	0	0	0	0	3	0	0	0
za	1997	21	2	0	24	3	0	2	0.979592	0.541667	2.70805
zm	1997	2	1	1	0	0	0	2	0	0.5	0.570545
zw	1997	17	10	1	0	0	0	1	0.964286	0.292683	1.09861
ae	1998	0	0	0	0	0	0	3	0	0	0.200671
ao	1998	0	0	0	0	0	0	3	0	0	-1.09861
at	1998	2	1	1	4	0	0	1	1	0.833333	2.3979
au	1998	10	0	0	45	0	0	1	1	0.951613	2.15176
be	1998	3	1	0	8	1	0	1	0.833333	0.956522	2.26868
bi	1998	0	0	0	0	0	0	3	0	0	-0.887303
bj	1998	0	0	0	0	0	0	2	0	0	-0.93827
bw	1998	0	1	0	0	0	0	2	1	0	1.66501
ca	1998	2	2	0	16	0	0	1	1	0	2.19722
cd	1998	0	0	0	0	0	0	3	0	0	0.788457
cf	1998	0	0	0	0	0	0	3	0	0.5	-0.100083
cg	1998	0	0	0	0	0	0	2	0	0	1.75786
ch	1998	27	0	0	19	3	0	1	0.973684	0.961538	2.19722
ci	1998	0	0	0	0	0	0	3	0	0	-2.19722
cm	1998	0	0	0	0	0	0	2	0	0	0.653926
cn	1998	0	0	1	1	1	0	2	0.666667	0	2.45674
de	1998	3	1	0	41	1	0	1	1	0.944444	2.70805
dj	1998	0	0	0	0	0	0	3	0	0	-2.70805
dk	1998	2	1	0	5	2	0	1	1	1	2.66259
eg	1998	0	0	0	0	0	0	3	0	0	-1.66501
es	1998	10	3	0	6	1	0	2	1	0.416667	2.12026
et	1998	7	2	1	5	2	0	1	0.941176	0.25	1.22378
fr	1998	0	0	1	0	0	0	1	0	0.1	2.61496
ga	1998	0	1	0	0	0	0	3	0	0	0.76214
gb	1998	13	5	0	37	0	0	1	0	0.318182	2.70805
gh	1998	0	0	0	0	0	0	3	0	0	1.46634
gn	1998	0	1	0	0	0	0	2	1	0	0.211309
gq	1998	0	0	0	0	0	0	2	0	0	-1.46634
hk	1998	1	1	0	2	1	0	1	1	0.35	1.46634
id	1998	0	0	0	0	0	0	3	0	0	1.60944
in	1998	3	3	0	5	0	1	2	0	0.611111	2.70805
it	1998	0	0	0	1	0	0	1	0	0.444444	2.56495
jp	1998	2	2	0	11	1	0	1	0.882353	0.709677	2.51231
ke	1998	0	1	1	0	0	0	2	1	0.545455	0.191055
kh	1998	0	0	0	0	0	0	3	0	0	-1.60944
kp	1998	0	0	0	0	0	0	3	0	0	-1.09861
kr	1998	0	0	0	0	0	0	1	0	0.142857	1.29928
la	1998	0	0	0	0	0	0	3	0	0	-1.09861
ml	1998	0	0	0	0	0	0	3	0	0	1.09861
mo	1998	0	0	0	0	0	0	2	0	0	0.653926
mw	1998	0	0	0	0	1	0	2	0	0.333333	1.09861
mx	1998	0	0	0	0	0	0	1	0	0.333333	0.955511
my	1998	0	0	0	1	0	0	3	1	0	1.66501
mz	1998	0	0	0	0	0	0	3	0	0	1.17007
na	1998	14	7	1	0	0	0	2	0.454545	0.920635	0.955511
ng	1998	0	0	0	0	0	0	2	0	0	-0.160343
nl	1998	0	1	0	0	0	0	1	1	1	2.26868
nz	1998	0	0	0	0	0	0	1	0	0	1.22378
ph	1998	0	0	1	0	0	0	3	1	0.4	1.48808
pl	1998	0	0	0	0	0	0	3	0	0	0.619039
pt	1998	0	0	0	0	0	0	1	0	0	0.653926
qa	1998	0	0	0	0	0	0	3	0	0	-1.09861
ru	1998	0	0	0	0	0	0	2	0	0	0.251314
rw	1998	0	0	0	0	0	0	3	0	0	-1.48808
sd	1998	0	0	0	0	0	0	2	0	0	0.236389
sg	1998	0	0	0	0	0	0	2	0	0	2.03688
sn	1998	0	0	0	0	0	0	2	0	0	1.41369
td	1998	0	1	1	1	0	0	3	1	0	0.367725
tg	1998	0	0	0	0	0	0	2	0	0	1.03609
th	1998	0	0	1	0	0	0	2	0	0.0555556	0.737599
tw	1998	0	0	1	13	0	1	3	0.933333	0.6875	-1.09861
tz	1998	2	7	0	1	0	0	2	1	0.944444	1.23676
ug	1998	0	0	0	0	0	0	3	0	0.333333	0
us	1998	13	2	0	149	3	0	1	1	0.951724	1.81529
vn	1998	0	0	0	1	0	0	3	1	0	-0.336472
za	1998	28	6	0	34	1	0	2	1	0.710145	2.75154
zm	1998	1	0	0	0	0	0	2	0	0.5	0.427444
zw	1998	19	15	0	1	0	0	1	1	0.608696	0.897942
ae	1999	0	0	1	0	0	0	3	0	0	0.367725
ao	1999	0	0	0	0	0	0	3	0	0	-1.09861
at	1999	0	0	0	2	0	0	1	1	0.8	2.45674
au	1999	3	0	0	24	0	0	1	1	0.964286	1.81529
be	1999	2	0	1	5	0	0	1	1	0.923077	2.33537
bi	1999	0	0	0	0	0	0	3	0	0	-0.998529
bj	1999	0	0	0	0	0	0	2	0	0	-1.02165
bw	1999	1	1	0	2	0	0	2	1	1	1.71765
ca	1999	3	0	0	16	0	0	1	1	0.714286	2.24071
cd	1999	0	0	0	0	0	0	2	0	0	0.847298
cf	1999	0	0	0	0	0	0	3	0	0	-0.191055
cg	1999	0	0	0	0	0	0	2	0	0	1.42139
ch	1999	32	2	0	36	3	0	1	0.916667	0.926829	2.79321
ci	1999	0	0	0	0	0	0	3	0	0	-2.3979
cm	1999	0	2	1	0	0	0	2	0	0	0.510826
cn	1999	1	3	4	3	0	1	2	0.454545	0.0833333	2.51231
de	1999	3	1	0	39	2	0	1	1	0.901961	2.75154
dj	1999	0	0	0	0	0	0	3	0	0	-2.83321
dk	1999	0	0	0	2	0	0	1	1	1	2.70805
eg	1999	1	2	0	0	0	0	3	1	0	-1.41369
es	1999	6	2	0	6	0	0	1	1	0.869565	2.19722
et	1999	5	4	0	5	2	0	1	1	0.85	0.887303
fr	1999	4	1	0	17	1	1	1	1	0.0909091	2.66259
ga	1999	0	0	0	0	0	0	3	0	0.5	0.510826
gb	1999	3	0	0	9	0	0	1	0	0.647059	2.75154
gh	1999	0	0	0	0	0	0	3	0	0	1.51635
gn	1999	0	0	0	0	0	0	2	0	0.5	0.100083
gq	1999	0	0	0	0	0	0	2	0	0	-1.60944
hk	1999	1	0	0	2	1	0	1	1	0.208333	1.81529
id	1999	0	0	0	0	0	0	2	0	0	1.66501
in	1999	2	7	0	2	2	0	2	0.583333	0.461538	2.75154
it	1999	0	0	0	0	1	0	1	1	0.125	2.61496
jp	1999	3	0	0	11	1	0	1	1	0.8	2.00148
ke	1999	2	2	3	2	2	0	2	0.9	0.222222	0.462624
kh	1999	0	0	0	0	0	0	3	0	0	-1.94591
kp	1999	0	0	0	0	0	0	3	0	0	-1.09861
kr	1999	0	0	0	0	0	0	1	0	0	1.46634
la	1999	0	0	0	0	0	0	3	0	0	-1.09861
ml	1999	0	0	0	0	0	0	3	0	0	1.29928
mo	1999	0	0	0	0	0	0	2	0	0	0.730888
mw	1999	2	1	0	0	1	0	2	0.75	0.25	0.897942
mx	1999	0	0	0	0	0	0	1	0	0	1.09861
my	1999	0	0	0	0	0	0	2	0	0.5	1.41369
mz	1999	0	0	1	0	0	0	3	1	0	1.5506
na	1999	6	16	1	2	0	0	2	0.44	0.814815	1.09861
ng	1999	0	0	0	0	0	0	2	0	0	-0.076961
nl	1999	0	0	0	2	0	0	1	1	0.142857	2.33537
nz	1999	0	0	0	0	0	0	1	0	0	1.335
ph	1999	0	0	0	0	0	0	2	0	0.333333	1.5506
pl	1999	1	0	0	8	0	0	1	1	0	1.22378
pt	1999	0	0	1	0	0	0	1	0	0	0.730888
qa	1999	0	0	0	0	0	0	3	0	0	-1.09861
ru	1999	0	0	1	0	0	0	2	0	0	0.451985
rw	1999	0	0	0	0	0	0	3	0	0	-1.5506
sd	1999	0	0	0	0	0	0	2	0	0	0.111226
sg	1999	0	0	0	0	0	0	2	0	0	2.12026
sn	1999	0	0	0	0	0	0	2	0	0	1.21302
td	1999	0	0	0	0	0	0	3	0	1	0.510826
tg	1999	0	0	0	0	0	0	2	0	0	0.869038
th	1999	0	0	0	1	0	0	1	1	0.030303	0.570545
tw	1999	1	0	0	10	1	1	3	1	1	-1.09861
tz	1999	0	4	0	0	0	0	2	0.6	0.909091	1.29928
ug	1999	0	0	0	1	0	0	3	0	0	-0.200671
us	1999	19	2	0	121	2	0	1	0.994505	0.906593	1.56398
vn	1999	0	0	0	0	0	0	3	0	0.5	-0.587787
za	1999	25	2	0	33	5	0	2	0.984127	0.729412	2.79321
zm	1999	0	0	0	0	0	0	2	0	0.125	0.302281
zw	1999	28	10	1	0	0	0	1	1	0.539683	1.5506
ae	2000	0	0	0	0	0	0	3	0	0.5	0.167054
ao	2000	0	0	0	0	0	0	3	0	0	-1.09861
at	2000	0	0	0	0	0	0	1	1	0.5	2.51231
au	2000	1	0	0	22	0	0	1	1	0.964286	2.24071
be	2000	2	1	0	10	2	0	1	0.857143	0.571429	1.82455
bi	2000	0	0	0	0	0	0	3	0	0	-1.09861
bj	2000	0	0	0	0	0	0	2	0	0	-0.570545
bw	2000	2	3	0	0	0	0	2	1	0.571429	1.76766
ca	2000	0	0	0	6	1	0	1	1	0.863636	1.90424
cd	2000	0	0	3	0	0	0	2	0	0	0.902868
cf	2000	0	0	0	0	0	0	3	0	0	-0.274437
cg	2000	0	0	0	0	0	0	2	0	0	1.17007
ch	2000	13	2	0	26	1	0	1	0.944444	0.983607	2.83321
ci	2000	0	0	0	0	0	0	3	0	0	-1.29928
cm	2000	7	4	1	0	0	0	2	0	0.176471	0.587787
cn	2000	13	4	2	14	1	1	2	0.933333	0.215686	2.56495
de	2000	5	0	0	37	1	0	1	0.895833	0.978261	2.79321
dj	2000	0	0	0	0	0	0	3	0	0	-2.94444
dk	2000	1	0	0	1	0	0	1	0	1	2.75154
eg	2000	2	4	2	1	1	0	3	0.7	0.272727	-1.46634
es	2000	8	1	0	8	0	0	1	0.958333	0.777778	2.26868
et	2000	3	6	0	2	1	0	1	1	0.761905	2.03688
fr	2000	7	3	0	119	11	0	1	0.735714	0.685714	2.70805
ga	2000	0	0	0	0	0	0	3	0	0	0.635989
gb	2000	3	0	0	6	1	1	1	0.818182	0.48	2.79321
gh	2000	0	0	0	0	0	0	3	0	0	1.56398
gn	2000	0	0	0	0	0	0	2	0	0	0
gq	2000	0	0	0	0	0	0	2	0	0	-1.7346
hk	2000	1	0	0	8	0	0	1	1	0.235294	1.86075
id	2000	0	0	0	0	0	0	2	0	0	2.10413
in	2000	6	16	1	4	1	0	2	0.607143	0.8	2.79321
it	2000	3	3	0	2	0	0	1	0.625	0.0909091	2.66259
jp	2000	0	0	1	5	0	0	1	0.875	0.789474	1.66501
ke	2000	18	15	0	1	0	0	2	0.969697	0.833333	0.534082
kh	2000	0	0	0	0	0	0	3	0	0	-2.19722
kp	2000	0	0	0	0	0	0	3	0	0	-1.09861
kr	2000	0	0	0	1	3	0	1	1	0	1.60944
la	2000	0	0	0	0	0	0	3	0	0	-1.09861
ml	2000	0	0	0	0	0	0	3	0	0	1.46634
mo	2000	0	0	0	0	0	0	2	0	0	0.802346
mw	2000	1	0	0	0	0	0	2	1	0.8	0.969401
mx	2000	0	0	0	0	0	0	1	0	0	1.22378
my	2000	0	0	0	0	0	0	2	0	0	1.76766
mz	2000	1	0	0	0	0	0	3	1	0.333333	1.29928
na	2000	14	6	0	3	0	0	2	1	0.892857	1.22378
ng	2000	0	0	0	0	0	0	2	0	0	-0.14842
nl	2000	2	1	0	27	0	0	1	0.9	0.333333	2.3979
nz	2000	0	1	0	6	0	0	1	1	0	1.43508
ph	2000	0	0	0	0	0	0	2	0	0	1.60944
pl	2000	0	0	0	3	0	0	1	1	1	1.335
pt	2000	3	4	1	2	1	0	1	0	0.5	0.802346
qa	2000	0	0	0	0	0	0	3	0	0	-1.09861
ru	2000	0	0	0	0	0	0	2	0	0.333333	0.619039
rw	2000	0	0	1	0	0	0	3	0	0	-1.60944
sd	2000	0	0	0	0	0	0	2	0	0	0.211309
sg	2000	0	0	0	0	0	0	2	0	0	2.19722
sn	2000	0	0	0	0	0	0	2	0	0	1.26567
td	2000	0	0	0	0	0	0	3	0	0	0.635989
tg	2000	0	0	0	0	0	0	2	0	0	1.15745
th	2000	0	0	1	0	0	0	1	1	0.0625	0.897942
tw	2000	2	1	1	4	0	0	3	1	0.928571	-1.09861
tz	2000	1	4	1	0	0	0	2	0.666667	0.571429	1.66501
ug	2000	1	2	0	0	0	0	3	0	0.5	-0.367725
us	2000	22	1	0	135	0	0	1	0.995595	0.953333	1.90424
vn	2000	0	0	0	1	0	0	3	1	0	0.251314
za	2000	11	2	0	0	0	0	2	0.923077	0.746988	2.83321
zm	2000	0	0	0	1	0	0	2	1	0	0.802346
zw	2000	17	12	0	0	0	0	1	1	0.557143	1.60944
ae	2001	0	0	0	0	0	0	3	0	0	0
ao	2001	0	0	0	0	0	0	3	0	0	-1.09861
at	2001	0	0	0	5	0	0	1	0.833333	0	2.56495
au	2001	2	0	0	24	0	0	1	1	0.958333	2.83321
be	2001	1	0	1	7	1	0	1	0.8	0.636364	2.45674
bi	2001	0	0	0	0	0	0	3	0	0	-0.268264
bj	2001	0	0	0	0	0	0	2	0	0	-0.427444
bw	2001	1	8	0	0	0	0	2	1	0.833333	1.81529
ca	2001	0	0	0	21	0	0	1	1	0.333333	1.94591
cd	2001	0	0	0	0	0	0	2	0	0.272727	0.955511
cf	2001	0	0	0	0	0	0	3	0	0	0
cg	2001	0	0	0	0	0	0	2	0	0	1.5506
ch	2001	18	2	0	33	2	0	1	0.93617	0.878049	2.87168
ci	2001	0	0	0	0	0	0	3	0	0	0.788457
cm	2001	0	1	0	0	0	0	2	0	0.375	0.659246
cn	2001	15	1	4	50	11	2	2	0.946667	0.277778	2.61496
de	2001	5	0	0	30	0	0	1	0.846154	0.826923	2.83321
dj	2001	0	0	0	1	0	0	3	0	0	-3.04452
dk	2001	0	0	0	1	0	0	1	0	0.666667	2.79321
eg	2001	0	0	1	3	2	0	3	0.833333	0.625	-0.847298
es	2001	3	1	0	8	0	0	1	1	0.68	2.33537
et	2001	0	2	0	0	1	0	1	1	0.75	2.12026
fr	2001	3	2	0	79	5	0	1	0.606742	0.933333	2.75154
ga	2001	0	0	0	0	0	0	3	0	0	0.747214
gb	2001	2	0	1	24	1	0	1	1	0.366667	2.83321
gh	2001	1	0	0	0	0	0	3	1	0	1.60944
gn	2001	0	0	0	0	0	0	2	0	0	0.869038
gq	2001	0	0	0	0	0	0	2	0	0	-0.367725
hk	2001	0	1	0	3	0	0	1	1	0.321429	2.83321
id	2001	0	0	0	0	0	0	2	0	0	2.15176
in	2001	10	4	0	6	4	2	2	0.36	0.903226	2.28238
it	2001	2	1	0	4	1	0	1	0.625	0.615385	2.70805
jp	2001	0	0	0	12	0	0	1	1	0.428571	2.10413
ke	2001	9	12	0	8	3	0	2	0.9375	0.891892	0.422857
kh	2001	0	0	0	0	0	0	3	0	0	-1.09861
kp	2001	0	0	0	0	0	0	3	0	0	-1.09861
kr	2001	0	0	0	0	0	0	1	0	0.4	1.09861
la	2001	0	0	0	0	0	0	3	0	0	-1.09861
ml	2001	0	0	0	0	0	0	3	0	0	0.955511
mo	2001	0	1	0	0	0	0	2	1	0	0.659246
mw	2001	3	0	1	0	0	0	2	1	0.5	0.802346
mx	2001	0	0	0	0	0	0	1	0	0	1.335
my	2001	0	0	0	2	0	0	2	1	0	1.81529
mz	2001	0	0	0	0	0	0	3	0	0.166667	1.35812
na	2001	8	8	0	1	0	0	2	1	0.84	1.335
ng	2001	0	0	0	0	0	0	2	0	0	-0.215111
nl	2001	5	1	1	11	1	0	1	0.157895	0.882353	2.45674
nz	2001	3	0	0	19	0	0	1	1	0.777778	1.52606
ph	2001	0	0	0	0	0	0	2	0	0	1.35812
pl	2001	2	0	0	1	0	0	1	1	0.75	1.43508
pt	2001	0	0	0	15	1	0	1	0	0.909091	0.869038
qa	2001	0	0	0	0	0	0	3	0	0	-1.09861
ru	2001	0	0	0	0	0	0	2	0	0	1.22378
rw	2001	0	0	0	0	0	0	3	0	0.25	-1.66501
sd	2001	0	0	0	0	0	0	2	0	0	0.100083
sg	2001	0	0	0	0	0	0	2	0	0	2.26868
sn	2001	0	0	0	0	0	0	2	0	0	1.31568
td	2001	0	0	0	0	0	0	3	0	0	0.747214
tg	2001	0	0	0	0	0	0	2	0	0	0.990399
th	2001	1	0	1	0	0	0	1	1	0.047619	0.969401
tw	2001	0	0	0	0	0	0	3	0	0.583333	-1.09861
tz	2001	1	6	3	0	0	0	2	0.866667	0.666667	1.71765
ug	2001	0	0	2	0	0	0	3	0	0.6	-0.510826
us	2001	16	1	2	116	3	0	1	0.994595	0.923977	1.94591
vn	2001	0	0	0	2	0	0	3	1	0.2	0.451985
za	2001	5	2	1	2	0	0	2	0.777778	0.245283	2.87168
zm	2001	0	0	0	0	0	0	2	0	0.125	0.659246
zw	2001	11	8	0	0	0	0	1	1	0.54717	1.66501
ae	2002	0	0	0	0	0	0	3	0	0	-0.143101
ao	2002	0	0	0	0	0	0	3	0	0	-1.09861
at	2002	0	0	0	0	0	0	1	0	0.625	2.61496
au	2002	0	0	0	0	0	0	1	0	0.896552	2.87168
be	2002	3	0	0	22	5	0	1	0.935484	0.529412	2.51231
bi	2002	0	0	0	0	0	0	3	0	0	0.37949
bj	2002	0	0	0	0	0	0	2	0	0	-0.510826
bw	2002	0	3	1	0	0	0	2	1	0.9	1.86075
ca	2002	0	0	0	15	0	0	1	1	0.75	2.36085
cd	2002	0	0	0	0	0	0	2	0	0	0.830348
cf	2002	0	1	0	0	0	0	3	0	0	-0.0833816
cg	2002	0	0	0	0	0	0	2	0	0	1.29928
ch	2002	14	1	0	15	1	0	1	0.965517	0.839286	2.90872
ci	2002	1	2	0	3	1	0	3	1	0	0.955511
cm	2002	0	0	0	0	0	0	2	0	0.1	0.725937
cn	2002	12	7	2	56	4	1	2	0.878378	0.560606	2.66259
de	2002	2	1	0	17	0	0	1	1	0.777778	2.87168
dj	2002	0	0	0	0	0	0	3	0	1	-3.13549
dk	2002	1	0	0	1	0	0	1	0.5	0.5	2.83321
eg	2002	2	4	0	13	2	2	3	0.904762	0.6	-0.902868
es	2002	6	1	0	5	0	0	1	1	0.75	2.3979
et	2002	2	3	1	2	0	0	1	1	0.5	2.19722
fr	2002	1	0	0	56	3	0	1	0.566667	0.917526	2.79321
ga	2002	0	0	0	0	0	0	3	0	0	0.847298
gb	2002	3	0	0	21	0	0	1	0.962963	0.608696	2.87168
gh	2002	0	0	0	0	0	0	3	0	0.333333	1.65292
gn	2002	0	0	0	0	0	0	2	0	0	0.931558
gq	2002	0	0	0	0	0	0	2	0	0	-0.510826
hk	2002	1	0	1	2	0	0	1	1	0.210526	2.87168
id	2002	0	0	0	0	0	0	2	0	0	1.81529
in	2002	1	11	0	3	1	0	2	0.5	0.806452	2.87168
it	2002	19	1	4	11	0	0	1	0.8	0.615385	2.75154
jp	2002	0	0	0	8	0	0	1	1	0.545455	1.76766
ke	2002	14	12	0	2	0	0	2	0.931034	0.695652	0.663294
kh	2002	0	0	0	0	0	0	3	0	0	-0.587787
kp	2002	0	0	0	0	0	0	3	0	0	-1.09861
kr	2002	0	0	0	0	0	0	1	0	0	1.22378
la	2002	0	0	0	0	0	0	3	0	0	-1.09861
ml	2002	0	0	0	0	0	0	3	0	0	1.7346
mo	2002	0	0	0	2	0	0	2	1	0.5	0.725937
mw	2002	2	0	0	0	0	0	2	1	0.5	1.09861
mx	2002	0	0	0	0	0	0	1	0	0	1.43508
my	2002	0	0	0	0	0	0	2	0	0.5	1.86075
mz	2002	0	0	1	0	0	0	3	1	0	1.41369
na	2002	8	6	0	0	0	0	2	0.928571	0.772727	1.43508
ng	2002	0	0	0	0	0	0	2	0	0	-0.277632
nl	2002	2	0	0	20	0	0	1	1	0.95	2.51231
nz	2002	0	0	0	9	0	0	1	1	0.88	2.19722
ph	2002	0	0	0	0	0	0	2	0	0	1.41369
pl	2002	1	0	0	2	0	0	1	1	0.75	1.52606
pt	2002	0	0	0	4	0	0	1	0	0.842105	0.725937
qa	2002	0	0	0	0	0	0	3	0	0	0
ru	2002	0	0	0	0	0	0	2	0	0	0.887303
rw	2002	0	0	0	0	0	0	3	0	0	-1.71765
sd	2002	0	0	0	0	0	0	2	0	0	0
sg	2002	0	1	1	0	0	1	1	1	0	2.33537
sn	2002	0	0	0	0	0	0	2	0	0	1.3633
td	2002	0	0	0	0	0	0	3	0	0	0.546544
tg	2002	0	0	0	0	0	0	2	0	0	0.847298
th	2002	0	3	5	0	3	6	1	1	0.0952381	1.03609
tw	2002	0	0	0	0	0	0	3	0	0	-1.09861
tz	2002	5	12	6	2	0	0	2	0.862069	0.769231	1.76766
ug	2002	1	0	1	1	0	0	3	0	0.5	-0.635989
us	2002	21	2	1	79	1	0	1	1	0.888889	1.98592
vn	2002	0	0	0	0	0	0	3	0	0.666667	0.200671
za	2002	3	6	0	16	0	0	2	0.76	0.147541	2.90872
zm	2002	1	2	0	0	0	0	2	1	0	0.725937
zw	2002	6	3	0	0	0	0	1	1	0.387755	1.71765
ae	2003	0	0	0	0	1	0	3	0	0	0.847298
ao	2003	0	0	0	0	0	0	3	0	0	-1.09861
at	2003	0	0	0	0	0	0	1	0	0	2.66259
au	2003	9	0	0	32	0	0	1	1	0	2.36085
be	2003	6	1	0	21	2	1	1	0	0.769231	2.56495
bi	2003	0	0	0	0	0	0	3	0	0	0.236389
bj	2003	0	0	0	0	0	0	2	0	0	-0.385662
bw	2003	4	10	0	0	0	0	2	1	0.571429	1.90424
ca	2003	0	0	0	24	0	0	1	1	0.75	2.94444
cd	2003	0	0	0	0	0	0	1	0	0	0.719123
cf	2003	0	0	1	0	0	0	3	1	0.5	0
cg	2003	0	0	0	0	2	0	2	0.5	0	1.35812
ch	2003	5	4	0	35	4	0	1	0.431818	0.90625	2.94444
ci	2003	0	0	0	0	1	0	3	1	0.35	1.09861
cm	2003	1	0	0	0	0	0	2	0	0	0.788457
cn	2003	5	3	1	50	2	0	2	0.393443	0.566929	2.70805
de	2003	4	0	0	26	0	0	1	0.923077	0.769231	2.90872
dj	2003	0	0	0	0	0	0	3	0	0	-0.635989
dk	2003	1	0	0	5	0	0	1	0	0.666667	2.87168
eg	2003	0	0	0	0	0	0	1	0	0.913043	-0.777705
es	2003	2	0	0	14	0	0	1	1	0.857143	2.45674
et	2003	3	3	0	1	1	1	1	1	1	1.6864
fr	2003	4	1	0	22	1	0	1	0.62069	0.857143	2.83321
ga	2003	0	0	0	0	0	0	3	0	0	0.93827
gb	2003	5	1	1	21	1	0	1	1	0.631579	2.90872
gh	2003	0	0	0	0	0	0	3	0	0	1.6946
gn	2003	0	0	0	0	0	0	2	0	0	0.990399
gq	2003	0	0	0	0	0	0	2	0	0	-0.635989
hk	2003	0	0	1	0	1	0	1	0	0.266667	2.90872
id	2003	2	0	0	0	0	0	2	1	0	1.86075
in	2003	37	16	1	3	1	0	2	0.965517	0.8	2.90872
it	2003	14	4	3	2	0	0	1	0.84	0.897436	2.79321
jp	2003	0	0	0	7	0	0	1	1	0.666667	1.51635
ke	2003	19	15	1	1	0	0	2	1	0.823529	0.722135
kh	2003	0	0	0	0	0	0	3	0	0	-0.251314
kp	2003	0	0	0	0	0	0	3	0	0	-1.09861
kr	2003	0	0	0	0	0	0	1	0	0	1.94591
la	2003	0	0	0	0	0	0	3	0	0	-1.09861
ml	2003	1	0	0	0	0	0	3	0	0	1.84583
mo	2003	0	0	1	0	0	0	2	0	0.666667	0.788457
mw	2003	1	3	1	0	0	0	2	0.8	0.666667	0.931558
mx	2003	0	0	0	0	0	0	1	0	0	1.52606
my	2003	1	0	0	0	0	0	2	0	0	1.90424
mz	2003	0	1	0	0	0	0	3	1	0.166667	1.46634
na	2003	5	6	1	1	0	0	2	0.846154	0.736842	1.52606
ng	2003	0	0	0	0	0	0	2	0	0	-0.336472
nl	2003	4	0	0	21	0	0	1	1	0.916667	2.56495
nz	2003	0	0	0	0	0	0	1	0	1	2.26868
ph	2003	0	0	0	0	0	0	2	0	0	1.46634
pl	2003	1	0	0	3	0	0	1	1	0.4	1.60944
pt	2003	3	1	0	28	1	0	1	0	0.571429	0.990399
qa	2003	0	0	0	0	0	0	3	0	0	0.510826
ru	2003	0	0	0	0	0	0	1	0	0	0.998529
rw	2003	0	0	0	0	0	0	3	0	0	-0.788457
sd	2003	0	0	0	0	0	0	2	0	0	-0.0909718
sg	2003	0	0	0	0	0	0	1	0	1	2.3979
sn	2003	0	0	0	0	0	0	3	0	0	1.40877
td	2003	0	0	0	0	0	0	3	0	0	0.37949
tg	2003	0	0	0	0	0	0	2	0	0	1.09861
th	2003	0	0	1	0	0	0	1	1	0.592593	1.09861
tw	2003	0	0	0	0	0	0	3	0	0	-1.09861
tz	2003	3	7	2	0	0	0	2	0.538462	0.925926	1.81529
ug	2003	0	3	0	0	0	0	3	0	0.428571	0.747214
us	2003	17	1	0	70	1	0	1	0.993243	0.864407	2.02438
vn	2003	0	0	0	0	0	0	1	0	0	0.76214
za	2003	8	5	0	4	1	0	2	0	0.625	2.94444
zm	2003	8	6	0	3	0	0	2	0.764706	0.75	0.788457
zw	2003	4	5	1	0	0	0	1	1	0.264706	1.76766
ae	2004	0	0	0	0	0	0	2	0	0.25	0.93827
ao	2004	0	0	0	0	0	0	3	0	0	-1.09861
at	2004	0	0	0	2	0	0	1	1	0	2.70805
au	2004	15	0	0	77	5	0	1	1	1	2.3979
be	2004	3	1	0	15	0	0	1	0	0.931034	2.61496
bi	2004	0	0	0	0	0	0	3	0	0	0.111226
bj	2004	0	0	0	0	0	0	2	0	0	0.0909718
bw	2004	0	3	1	0	0	0	2	1	0.875	1.94591
ca	2004	1	0	0	21	1	0	1	1	0.774194	4.11087
cd	2004	0	0	0	0	0	0	1	0	0	1.09861
cf	2004	0	1	0	0	0	0	3	1	0.333333	0.389465
cg	2004	0	0	1	0	0	0	2	0	0.25	1.41369
ch	2004	2	0	0	23	1	0	1	1	0.956522	2.43361
ci	2004	0	1	0	0	1	0	3	1	0.125	1.22378
cm	2004	2	2	0	0	1	1	2	0.8	0.05	0.663294
cn	2004	2	0	0	67	4	0	2	0.972603	0.772152	2.19722
de	2004	3	1	0	13	0	0	1	0.730769	0.882353	2.94444
dj	2004	0	0	0	0	0	0	3	0	0	-0.747214
dk	2004	0	0	0	5	0	0	1	0	0.857143	2.90872
eg	2004	1	0	0	0	1	0	1	1	0	-0.510826
es	2004	0	0	0	10	0	0	1	0	0.727273	2.51231
et	2004	2	7	1	5	0	0	1	1	0.75	1.75786
fr	2004	1	1	0	5	0	0	1	0	0.8	2.87168
ga	2004	1	0	0	0	0	0	3	1	0	1.02165
gb	2004	1	0	0	7	0	0	1	1	0.430769	2.94444
gh	2004	1	0	0	0	0	0	3	1	0	1.7346
gn	2004	0	0	0	0	0	0	2	0	0	1.04597
gq	2004	0	0	0	0	0	0	2	0	0	-0.747214
hk	2004	2	1	0	2	3	0	1	0.8	0.25	2.3979
id	2004	0	0	1	0	0	0	1	1	0.666667	1.90424
in	2004	0	3	0	0	1	0	2	0.5	0.892308	2.94444
it	2004	0	0	0	9	0	0	1	0.222222	0.884615	2.83321
jp	2004	0	0	0	6	0	0	1	1	0.583333	1.86075
ke	2004	8	13	0	0	0	0	2	0.857143	0.878049	0.610909
kh	2004	0	0	0	0	0	0	3	0	0	-0.451985
kp	2004	0	0	0	0	0	0	3	0	0	-1.09861
kr	2004	0	1	0	1	0	0	1	1	0	2.03688
la	2004	0	0	0	0	0	0	3	0	0	-1.09861
ml	2004	0	0	0	0	0	0	3	0	1	1.94591
mo	2004	0	0	0	0	0	0	2	0	1	0.663294
mw	2004	1	0	1	0	0	0	2	1	1	0.990399
mx	2004	0	0	0	0	0	0	1	0	0	1.60944
my	2004	1	0	0	1	0	0	2	0	0.333333	1.94591
mz	2004	0	2	0	0	0	0	3	1	0.04	1.51635
na	2004	8	3	0	0	0	0	2	1	0.684211	1.60944
ng	2004	0	0	0	0	0	0	2	0	0	-0.129212
nl	2004	0	1	0	2	0	0	1	0	0.833333	2.61496
nz	2004	0	0	0	0	0	0	1	0	0	1.75786
ph	2004	0	0	0	0	0	0	2	0	0	1.81529
pl	2004	2	0	0	4	0	0	1	0.6	0.666667	1.6864
pt	2004	0	0	0	43	0	0	1	0	0.942857	1.04597
qa	2004	0	0	0	0	0	0	3	0	0	0.847298
ru	2004	0	0	0	0	0	0	1	0	0	1.09861
rw	2004	0	0	0	2	0	0	3	0	0	-0.847298
sd	2004	0	0	0	0	0	0	2	0	0	0.351398
sg	2004	0	0	0	0	0	0	1	0	0	2.45674
sn	2004	0	0	0	0	0	0	2	0	0	1.45225
td	2004	0	0	0	0	0	0	3	0	0	0.737599
tg	2004	0	0	0	0	0	0	2	0	0	1.14862
th	2004	1	0	1	2	4	0	1	1	0.0555556	1.15745
tw	2004	0	0	0	0	0	0	3	0	0	-1.09861
tz	2004	0	7	3	0	0	0	2	0.1	0.8	1.86075
ug	2004	1	0	1	0	0	0	3	0.5	0.428571	0.546544
us	2004	20	1	1	92	1	0	1	0.994186	0.807339	2.06142
vn	2004	0	0	1	0	0	0	1	1	0	0.510826
za	2004	4	2	0	2	3	0	2	0.0909091	0.358974	2.97893
zm	2004	15	7	0	1	3	0	2	1	0.73913	0.847298
zw	2004	1	1	0	0	0	0	1	1	0.454545	1.51635
ae	2005	0	0	0	0	0	0	1	0	0	1.02165
ao	2005	0	0	0	0	0	0	3	0	0	-1.09861
at	2005	0	0	0	1	0	0	1	1	1	2.75154
au	2005	8	1	0	56	0	0	1	1	1	2.97893
be	2005	3	1	0	8	0	0	1	0	1	2.66259
bi	2005	0	0	0	0	0	0	3	0	0	1.17007
bj	2005	0	0	0	0	0	0	2	0	0	0
bw	2005	3	6	0	0	1	0	2	1	0.8	1.6946
ca	2005	0	0	0	0	0	0	1	0	0.821429	4.14313
cd	2005	0	0	0	0	0	0	1	0	0	1.1421
cf	2005	0	0	0	0	0	0	3	0	0.5	0.298493
cg	2005	0	0	1	0	0	0	2	0	1	1.21302
ch	2005	2	0	0	10	0	0	1	0.818182	0.896552	2.4681
ci	2005	1	0	0	1	0	0	3	1	0.222222	1.335
cm	2005	1	0	3	0	0	0	2	0	0.25	0.552069
cn	2005	2	0	0	63	0	0	2	0	0.737374	2.24071
de	2005	6	1	0	35	0	0	1	0.698113	0.809524	2.97893
dj	2005	0	0	0	0	0	0	3	0	0	-0.546544
dk	2005	0	0	0	5	0	0	1	0	1	2.94444
eg	2005	0	0	0	0	0	0	1	0	0.166667	-0.419854
es	2005	0	0	0	10	0	0	1	0	0.833333	2.56495
et	2005	6	3	2	68	3	0	1	1	0.789474	2.3979
fr	2005	4	5	0	24	4	0	1	0.432432	0.35	2.90872
ga	2005	0	2	1	0	0	0	3	1	0.25	1.09861
gb	2005	1	0	0	17	1	0	1	1	0.235294	2.97893
gh	2005	0	0	0	0	0	0	3	0	0.333333	1.77307
gn	2005	0	0	0	0	0	0	2	0	0	0.902868
gq	2005	0	0	0	0	0	0	2	0	0	-0.546544
hk	2005	0	0	2	3	0	0	1	0	0.294118	2.43361
id	2005	0	0	0	0	0	0	1	0	0.25	2.32239
in	2005	5	4	0	0	0	0	2	0.222222	0.571429	2.97893
it	2005	1	0	0	13	1	0	1	0.533333	0.75	2.87168
jp	2005	0	0	0	5	1	0	1	0.857143	0.857143	2.28238
ke	2005	26	28	1	2	1	0	2	0.810345	0.777778	0.666479
kh	2005	0	0	0	0	0	0	3	0	0	-0.619039
kp	2005	0	0	0	0	0	0	3	0	0	-1.09861
kr	2005	0	0	0	0	0	0	1	0	0.333333	1.52606
la	2005	0	0	0	0	0	0	3	0	0	-1.09861
ml	2005	0	0	0	0	0	0	3	0	0	1.43508
mo	2005	0	0	0	0	0	0	2	0	0	0.722135
mw	2005	2	5	0	0	0	0	2	1	0.4	1.04597
mx	2005	0	0	0	0	0	0	1	0	0	1.6864
my	2005	0	0	0	0	0	0	2	0	0.5	1.98592
mz	2005	0	0	3	3	0	0	3	1	0.0833333	1.56398
na	2005	6	6	0	0	0	0	2	1	0.785714	1.6864
ng	2005	0	0	0	0	0	0	2	0	0	-0.0625204
nl	2005	0	1	0	2	0	0	1	0	0.666667	2.66259
nz	2005	0	0	0	0	0	0	1	0	0	2.3979
ph	2005	0	0	4	0	0	0	2	0	0	1.86075
pl	2005	0	0	0	0	0	0	1	0	1	1.75786
pt	2005	0	0	0	32	0	0	1	0	1	1.09861
qa	2005	0	0	0	2	0	0	3	1	0	1.09861
ru	2005	0	0	0	0	0	0	1	0	0	1.18958
rw	2005	0	0	0	1	0	0	3	0	0.4	-0.902868
sd	2005	1	0	0	0	0	0	2	1	0	0.600774
sg	2005	0	0	0	0	0	0	1	0	0	2.51231
sn	2005	0	0	0	0	0	0	2	0	0	1.49393
td	2005	0	0	0	0	0	0	3	0	0	0.820981
tg	2005	0	0	0	0	0	0	2	0	0	1.19625
th	2005	0	0	0	0	0	0	1	0	0.380952	1.21302
tw	2005	0	0	0	1	0	0	3	0	0	-1.09861
tz	2005	0	5	1	0	0	0	2	0	0.526316	1.90424
ug	2005	0	0	0	0	0	0	3	0	1	0.37949
us	2005	17	1	0	97	0	0	1	1	0.835821	2.09714
vn	2005	0	0	0	0	0	0	1	0	0.5	0.310155
za	2005	1	1	0	0	0	0	2	0	0.255814	3.01226
zm	2005	7	4	0	1	0	0	2	0.923077	0.83871	0.902868
zw	2005	12	9	1	1	0	0	1	0.666667	0.0769231	1.86075
ae	2006	0	0	0	0	1	0	1	1	0	1.09861
ao	2006	0	0	0	0	0	0	3	0	0	-1.09861
at	2006	1	0	0	1	0	0	1	0	0.25	2.79321
au	2006	11	1	0	68	1	0	1	1	1	2.4681
be	2006	1	0	0	11	1	0	1	0	0.733333	2.70805
bi	2006	0	0	0	0	0	0	3	0	0	0.969401
bj	2006	0	0	0	0	0	0	2	0	0	0.251314
bw	2006	6	14	0	0	0	0	2	1	0.833333	1.7346
ca	2006	0	0	0	1	0	0	1	1	0	4.17439
cd	2006	1	0	0	2	1	0	1	1	0	1.18377
cf	2006	0	0	0	0	0	0	3	0	0	0.215111
cg	2006	0	0	0	0	0	0	2	0	0.125	1.04597
ch	2006	0	0	0	11	0	0	1	0.909091	0.647059	2.50144
ci	2006	0	0	0	0	0	0	3	0	0.25	0.998529
cm	2006	2	7	0	5	2	0	2	0	0.25	0.777705
cn	2006	11	5	1	20	2	0	1	0	0.780488	2.83321
de	2006	1	1	0	48	1	0	1	0.772727	0.857143	3.01226
dj	2006	0	0	0	0	0	0	3	0	0	-0.37949
dk	2006	1	0	0	1	0	0	1	0	1	2.97893
eg	2006	0	0	0	0	0	0	1	0	0	-0.475424
es	2006	0	0	0	7	0	0	1	0	0.909091	2.61496
et	2006	0	0	0	0	0	0	1	0	0.975	1.88707
fr	2006	7	6	0	37	6	0	1	0.789474	0.74	2.94444
ga	2006	0	0	0	0	0	0	2	0	0.375	1.17007
gb	2006	0	0	0	23	0	0	1	0.958333	0.38	3.01226
gh	2006	0	0	0	0	0	0	3	0	0	1.5724
gn	2006	0	0	0	0	0	0	2	0	0	0.777705
gq	2006	0	0	0	0	0	0	2	0	0	-0.37949
hk	2006	0	0	2	1	1	0	1	0.25	0.25	3.01226
id	2006	2	0	0	0	0	0	1	1	0	2.36085
in	2006	3	2	0	0	0	0	2	0	0.75	3.01226
it	2006	2	0	0	6	0	0	1	0.75	1	2.90872
jp	2006	0	0	1	7	0	2	1	1	0.545455	2.32239
ke	2006	31	22	1	4	2	0	2	0.842105	0.95082	0.719123
kh	2006	0	0	0	0	0	0	3	0	0	0
kp	2006	0	0	0	0	0	0	3	0	0	-1.09861
kr	2006	0	0	0	0	0	0	1	0	0	2.19722
la	2006	0	0	0	0	0	0	3	0	0	-1.60944
ml	2006	0	0	0	0	0	0	2	0	0	1.52606
mo	2006	0	0	0	0	0	0	2	0	0	0.955511
mw	2006	0	0	0	0	0	0	2	0	0.777778	1.09861
mx	2006	0	0	0	0	0	0	1	0	0	1.75786
my	2006	0	0	0	0	0	0	2	0	0	2.02438
mz	2006	0	0	0	0	0	0	2	0	0.125	1.60944
na	2006	5	3	0	1	0	0	2	1	0.857143	1.75786
ng	2006	0	0	0	0	0	0	2	0	0	-0.121361
nl	2006	0	0	0	5	0	0	1	0	0.375	2.70805
nz	2006	0	0	0	0	0	0	1	0	0	2.45674
ph	2006	0	1	0	1	0	0	2	0	0.444444	1.60944
pl	2006	0	0	0	4	0	0	1	0	0	1.82455
pt	2006	0	0	0	3	0	0	1	0	1	1.14862
qa	2006	0	0	0	4	0	0	3	1	0.285714	1.29928
ru	2006	0	0	0	0	0	0	1	0	0	1.27297
rw	2006	0	1	0	0	0	0	3	1	0.25	-0.955511
sd	2006	1	5	3	1	0	0	2	0.9	0.25	0.489548
sg	2006	1	0	1	0	0	0	1	0.5	0	2.56495
sn	2006	0	0	0	0	0	0	1	0	0	1.53393
td	2006	0	0	0	0	0	0	3	0	0	0.653926
tg	2006	0	0	0	0	0	0	2	0	0	1.24171
th	2006	0	0	0	0	0	0	1	0	0	1.26567
tw	2006	0	0	2	0	0	0	3	0	0.333333	-1.09861
tz	2006	15	29	1	2	0	0	2	0.829787	0.5	1.94591
ug	2006	0	1	1	1	1	0	3	0	0	1.34993
us	2006	20	2	0	92	0	0	1	0.993939	0.786207	2.13163
vn	2006	0	1	1	0	0	0	1	0	0	0.143101
za	2006	2	3	1	0	0	1	2	0.166667	0.0571429	3.04452
zm	2006	13	9	0	2	1	0	2	0.956522	0.571429	0.955511
zw	2006	5	10	1	1	2	0	1	0.75	0.575	1.60944
ae	2007	0	0	0	1	0	0	1	0	0.2	1.17007
ao	2007	0	0	0	0	0	0	3	0	0	-1.09861
at	2007	1	0	0	2	0	0	1	1	0.666667	2.83321
au	2007	3	0	0	78	0	0	1	1	0.975309	2.50144
be	2007	0	1	0	7	0	0	1	0	0.666667	2.75154
bi	2007	0	0	0	0	0	0	3	0	0	0.802346
bj	2007	0	0	0	0	0	0	2	0	0	0.160343
bw	2007	2	4	1	0	1	0	2	1	0.909091	1.53393
ca	2007	0	0	0	2	0	0	1	1	0.1	4.20469
cd	2007	0	0	0	0	0	0	1	0	0.272727	1.22378
cf	2007	0	0	0	0	0	0	3	0	0	0.13815
cg	2007	0	0	0	0	0	0	2	0	0	1.31568
ch	2007	0	1	0	7	1	0	1	0.875	0.785714	2.5337
ci	2007	0	0	0	0	0	0	3	0	0	0.747214
cm	2007	1	1	2	0	0	0	1	0	0.56	0.830348
cn	2007	11	2	2	71	7	1	1	0	0.627451	2.87168
de	2007	7	1	0	28	0	0	1	1	0.894737	3.04452
dj	2007	0	0	0	0	0	0	3	0	0	-0.236389
dk	2007	0	0	0	1	0	0	1	0	1	3.01226
eg	2007	0	0	0	0	0	0	1	0	0	-0.528067
es	2007	0	0	0	0	0	0	1	0	0.583333	2.66259
et	2007	0	0	0	0	0	0	1	0	0	2.51231
fr	2007	8	4	0	4	3	0	1	0	0.888889	2.97893
ga	2007	0	0	0	0	0	0	2	0	0	0.969401
gb	2007	1	0	0	9	1	0	1	1	0.425926	3.04452
gh	2007	0	0	0	0	0	0	3	0	0	1.60944
gn	2007	0	0	0	0	0	0	2	0	0	0.666479
gq	2007	0	0	0	0	0	0	2	0	0	-0.236389
hk	2007	0	1	0	0	0	0	1	1	0.266667	3.04452
id	2007	0	4	0	0	0	0	1	1	0.181818	2.3979
in	2007	3	5	0	2	0	0	2	0	0.714286	2.50144
it	2007	0	0	0	4	1	0	1	0.6	0.5	2.94444
jp	2007	0	0	0	4	1	0	1	1	0.692308	2.36085
ke	2007	10	16	0	3	0	0	2	0.925926	0.934426	0.769133
kh	2007	0	0	0	0	0	0	1	0	0	-0.167054
kp	2007	0	0	0	0	0	0	3	0	0	-1.09861
kr	2007	0	0	0	0	0	0	1	0	0	2.26868
la	2007	0	0	0	0	0	0	3	0	0	-1.94591
ml	2007	0	0	0	0	0	0	2	0	0	1.18958
mo	2007	0	0	0	0	0	0	2	0	0	1.00552
mw	2007	0	0	0	0	0	0	2	0	0	1.14862
mx	2007	0	0	0	0	0	0	1	0	0	1.42139
my	2007	0	0	0	0	0	0	2	0	0	2.06142
mz	2007	0	0	0	0	0	0	2	0	0	1.65292
na	2007	5	5	0	0	0	0	2	1	0.615385	1.82455
ng	2007	0	0	0	0	0	0	2	0	0	-0.0588405
nl	2007	3	4	0	6	0	0	1	0	0.625	2.75154
nz	2007	1	0	0	4	0	0	1	1	0	2.51231
ph	2007	0	0	0	0	0	0	2	0	0.0714286	1.94591
pl	2007	0	0	0	0	0	0	1	0	1	1.88707
pt	2007	0	0	1	49	0	0	1	0	0.5	1.19625
qa	2007	1	0	0	0	0	0	1	0	1	1.46634
ru	2007	0	0	0	0	0	0	1	0	0	1.34993
rw	2007	0	0	0	0	0	0	3	0	0.142857	-1.00552
sd	2007	0	1	1	0	1	0	2	0.333333	0.625	0.389465
sg	2007	0	0	0	0	0	0	1	0	0.285714	2.61496
sn	2007	0	0	0	0	0	0	1	0	0	1.5724
td	2007	0	1	0	0	0	0	3	1	0	0.510826
tg	2007	0	0	0	0	0	0	2	0	0	1.09861
th	2007	0	0	0	0	0	0	1	0	0	1.31568
tw	2007	1	0	0	0	1	0	3	0	0.5	-1.09861
tz	2007	10	13	4	2	1	1	2	0.878788	0.886792	1.98592
ug	2007	0	2	3	0	1	0	3	0.8	0.8	1.09861
us	2007	11	2	0	72	0	0	1	1	0.679012	2.16496
vn	2007	0	1	0	0	0	0	1	0	0.285714	1.18958
za	2007	2	2	0	0	0	0	2	0.5	0.176471	3.07577
zm	2007	4	3	1	7	0	1	2	0.875	0.851852	1.00552
zw	2007	1	1	0	0	0	0	1	1	0.513514	1.65292
ae	2008	0	0	0	0	0	0	1	0	0.166667	1.23676
ao	2008	0	0	0	0	0	0	3	0	0	-1.09861
at	2008	0	0	0	0	0	0	1	0	0.6	2.87168
au	2008	9	2	0	71	1	0	1	1	0.987805	2.5337
be	2008	1	0	0	6	0	0	1	0	0.8	2.79321
bi	2008	0	0	1	0	0	0	3	1	0	0.659246
bj	2008	0	0	0	0	0	0	2	0	0	0.076961
bw	2008	4	7	2	0	1	0	2	0.928571	1	1.36688
ca	2008	0	0	0	6	0	0	1	1	0.4	3.10608
cd	2008	0	0	0	0	0	0	1	0	0	1.09861
cf	2008	0	0	0	0	0	0	3	0	0	0.475424
cg	2008	0	0	0	3	0	0	2	0	0	1.14862
ch	2008	1	1	0	4	1	0	1	1	0.8	2.56495
ci	2008	0	0	0	0	0	0	3	0	0	0.546544
cm	2008	2	4	0	0	0	0	1	0	0.285714	0.719123
cn	2008	6	7	1	28	11	1	1	0	0.743802	2.90872
de	2008	8	0	0	18	0	0	1	0.941176	0.868421	3.07577
dj	2008	0	0	0	0	0	0	3	0	0	-0.111226
dk	2008	0	0	0	1	0	0	1	1	1	3.04452
eg	2008	0	0	0	0	0	0	1	0	0	-0.444686
es	2008	0	0	0	0	0	0	1	0	0	2.70805
et	2008	1	1	0	1	1	0	1	0.25	0	2.00148
fr	2008	3	1	0	5	1	0	1	0	0.730769	3.01226
ga	2008	0	1	0	0	0	0	2	0	0	1.03609
gb	2008	0	0	0	7	0	0	1	1	0.3125	3.07577
gh	2008	0	0	0	0	0	0	3	0	0	1.64516
gn	2008	0	0	0	0	0	0	2	0	0	1.05315
gq	2008	0	0	0	0	0	0	2	0	0	-0.111226
hk	2008	1	2	0	1	1	0	1	0.75	0.142857	3.07577
id	2008	1	1	0	0	0	0	1	1	0.444444	2.43361
in	2008	2	3	0	0	0	0	2	0	0.833333	2.5337
it	2008	0	0	0	3	0	0	1	0.666667	0.625	2.97893
jp	2008	1	0	0	6	0	0	1	1	0.625	2.3979
ke	2008	14	11	1	4	1	0	2	0.966667	0.931034	0.816761
kh	2008	0	0	0	0	0	0	1	0	0	-0.310155
kp	2008	0	0	0	0	0	0	3	0	0	-1.09861
kr	2008	0	0	0	0	0	0	1	0	0	2.33537
la	2008	0	0	0	0	0	0	3	0	0	-2.19722
ml	2008	0	0	0	0	0	0	2	0	0	0.93827
mo	2008	0	0	0	0	0	0	2	0	0	1.05315
mw	2008	0	0	0	0	0	0	2	0	0	1.19625
mx	2008	0	0	0	0	0	0	1	0	0	1.48808
my	2008	0	0	0	0	0	0	2	0	0	2.09714
mz	2008	0	0	0	20	0	0	2	1	0	1.6946
na	2008	6	6	2	0	0	0	2	0.928571	0.909091	1.48808
ng	2008	0	0	0	0	0	0	2	0	0	0.11441
nl	2008	2	0	0	3	0	0	1	0	0.764706	2.79321
nz	2008	0	0	0	2	0	0	1	1	0.384615	2.56495
ph	2008	0	0	0	0	0	0	2	0	0	1.98592
pl	2008	0	0	0	2	0	0	1	0	0	1.94591
pt	2008	1	0	0	22	0	0	1	0	0.961538	1.24171
qa	2008	0	0	0	0	0	0	1	0	0.333333	0.955511
ru	2008	0	0	0	0	0	0	1	0	0	1.42139
rw	2008	0	0	0	0	0	0	3	0	0	-0.419854
sd	2008	29	1	0	22	1	0	2	0.97561	0.6	0.298493
sg	2008	0	0	0	0	0	0	1	0	0	2.66259
sn	2008	0	0	0	0	0	0	1	0	0	1.60944
td	2008	0	0	0	0	0	0	3	0	1	0.385662
tg	2008	0	0	0	0	0	0	2	0	0	0.973449
th	2008	0	0	1	1	0	0	1	0	0	1.3633
tw	2008	0	0	0	1	1	0	3	0	0.5	-1.09861
tz	2008	2	9	0	0	0	0	2	1	0.909091	1.7346
ug	2008	0	3	1	1	0	0	3	1	0.555556	0.897942
us	2008	15	0	0	46	1	0	1	1	0.726496	2.19722
vn	2008	0	0	0	0	0	0	1	0	0.5	1.27297
za	2008	4	3	0	0	1	0	2	0.666667	0.133333	3.10608
zm	2008	4	5	0	6	1	0	2	0.9375	0.941176	1.05315
zw	2008	7	6	1	0	0	0	1	0.928571	0.125	1.6946
ae	2009	0	0	0	0	0	0	1	0	0	1.29928
ao	2009	0	0	0	0	0	0	3	0	0	-1.09861
at	2009	0	0	0	1	0	0	1	1	0	2.90872
au	2009	15	0	0	46	0	0	1	0.993506	1	2.56495
be	2009	0	1	0	4	0	0	1	1	0.777778	2.28238
bi	2009	0	0	0	0	0	0	3	0	0.0833333	0.534082
bj	2009	0	0	0	0	0	0	2	0	0	0
bw	2009	8	8	2	0	0	0	2	1	1	1.84583
ca	2009	0	0	0	0	0	0	1	0	0.75	2.59525
cd	2009	0	0	0	0	0	0	1	0	0	1.13708
cf	2009	0	0	0	1	1	0	3	0	0	0.392042
cg	2009	0	0	0	0	0	0	2	0	0.333333	1.00552
ch	2009	0	0	0	2	0	0	1	0	0.75	3.13549
ci	2009	0	0	0	0	0	0	3	0	0	0.37949
cm	2009	6	0	2	4	0	0	1	0	0.857143	0.619039
cn	2009	26	12	2	682	29	1	1	0.982313	0.468468	2.94444
de	2009	6	2	0	51	1	0	1	0.617647	0.8125	3.10608
dj	2009	0	0	0	0	0	0	3	0	0	-0.211309
dk	2009	0	0	0	0	0	0	1	0	1	3.07577
eg	2009	0	0	0	0	0	0	1	0	0	-0.367725
es	2009	0	0	0	1	0	0	1	0	0	2.75154
et	2009	1	2	1	1	0	1	1	0	0.4	1.66501
fr	2009	1	2	0	4	0	0	1	0	0.769231	3.04452
ga	2009	0	0	1	0	0	0	2	0	1	1.09861
gb	2009	0	0	0	15	1	0	1	1	0.35	3.10608
gh	2009	0	0	0	0	0	0	3	0	0	1.4781
gn	2009	0	0	0	0	0	0	2	0	0	1.09861
gq	2009	0	0	0	0	0	0	2	0	0	-0.211309
hk	2009	0	6	0	1	0	0	1	1	0.307692	3.10608
id	2009	0	0	0	0	0	0	1	0	0.666667	2.09714
in	2009	7	4	0	0	2	0	2	0	1	3.10608
it	2009	0	0	0	0	0	0	1	0	0.5	3.01226
jp	2009	0	0	0	2	1	0	1	1	0.375	2.43361
ke	2009	33	40	4	12	0	0	2	1	0.789474	0.862224
kh	2009	0	0	0	0	0	0	1	0	0	0.747214
kp	2009	0	0	0	0	0	0	3	0	0	-1.09861
kr	2009	0	0	0	0	0	0	1	0	0	2.3979
la	2009	0	0	0	0	0	0	3	0	0	-2.3979
ml	2009	0	0	0	0	0	0	2	0	0	2.33537
mo	2009	0	0	0	0	0	0	2	0	0	1.09861
mw	2009	0	0	0	0	0	0	2	0	0	1.24171
mx	2009	0	0	0	0	0	0	1	0	0	1.5506
my	2009	0	0	0	0	0	0	2	0	0	2.13163
mz	2009	0	0	0	0	0	0	2	0	0.833333	1.7346
na	2009	14	9	0	0	0	0	1	1	0.777778	1.5506
ng	2009	0	0	0	0	0	0	2	0	0	0.167054
nl	2009	0	0	0	3	0	0	1	0	1	2.83321
nz	2009	0	0	0	1	0	0	1	1	0.222222	2.61496
ph	2009	0	0	1	0	0	0	2	1	0	1.7346
pl	2009	0	0	0	1	0	0	1	0	0.666667	2.00148
pt	2009	0	0	0	0	0	0	1	0	1	1.2852
qa	2009	0	0	0	0	0	0	1	0	0	1.7346
ru	2009	0	0	0	0	0	0	1	0	0	1.48808
rw	2009	0	0	0	0	0	0	3	0	0	-0.475424
sd	2009	38	0	0	30	3	0	2	1	0.953488	0.666479
sg	2009	0	0	0	0	0	0	1	0	0	2.70805
sn	2009	0	0	0	0	0	0	1	0	0	1.64516
td	2009	0	0	0	0	0	0	3	0	0	0.274437
tg	2009	0	0	0	0	0	0	2	0	0	1.01693
th	2009	0	0	2	0	0	0	1	0	0.0454545	1.40877
tw	2009	2	0	0	1	0	0	3	0	0.5	-1.09861
tz	2009	7	15	3	2	1	0	2	1	0.916667	1.77307
ug	2009	0	1	0	0	0	0	3	0	1	0.730888
us	2009	14	1	0	73	0	0	1	1	0.670455	2.22848
vn	2009	0	2	4	0	0	0	1	0.5	0	1.34993
za	2009	5	7	0	4	5	2	2	0.521739	0.222222	3.13549
zm	2009	3	5	1	3	0	0	2	0.818182	0.727273	1.09861
zw	2009	11	16	1	0	1	0	1	0.9	0.451613	1.7346
ae	2010	0	0	0	0	0	0	1	0	0	1.35812
ao	2010	0	0	0	0	0	0	3	0	0	-1.09861
at	2010	1	0	0	0	0	0	1	1	1	2.94444
au	2010	0	0	0	0	0	0	1	0	0.952381	2.59525
be	2010	4	1	1	24	3	0	1	1	0.625	2.32239
bi	2010	0	0	0	0	0	0	3	0	0	0.422857
bj	2010	0	0	0	0	0	0	2	0	0	0.361013
bw	2010	4	8	1	0	0	0	2	0.923077	0.9	3.07577
ca	2010	0	0	0	0	0	0	1	0	0	3.16407
cd	2010	0	0	2	0	0	0	1	0	0	1.17412
cf	2010	2	0	0	0	0	0	3	0	1	0.578078
cg	2010	0	0	0	0	0	0	2	0	0	0.880359
ch	2010	0	0	0	8	1	1	1	1	0.4	3.16407
ci	2010	0	0	0	0	0	0	3	0	0	1.02165
cm	2010	3	0	0	1	1	0	1	0	0.75	0.816761
cn	2010	40	3	0	664	13	1	1	0.971429	0.879952	2.97893
de	2010	3	0	0	32	0	0	1	0.844444	0.9375	3.13549
dj	2010	0	0	0	0	0	0	3	0	0	-0.302281
dk	2010	0	0	0	3	0	0	1	0.666667	0	3.10608
eg	2010	0	0	0	0	0	0	1	0	0	-0.417735
es	2010	1	0	0	23	0	0	1	0	0.333333	2.79321
et	2010	1	0	0	0	0	0	1	0	0.0340136	2.10413
fr	2010	2	1	0	20	2	0	1	0	0.225806	3.07577
ga	2010	0	1	2	5	6	1	2	0.125	0.333333	1.15745
gb	2010	1	0	0	7	0	0	1	0.888889	0.262295	3.13549
gh	2010	0	0	0	0	0	0	3	0	0	1.335
gn	2010	0	0	0	0	0	0	2	0	0	0.973449
gq	2010	0	0	0	0	0	0	1	0	0	-0.302281
hk	2010	1	3	3	27	7	1	1	0.975	0.222222	3.13549
id	2010	0	0	0	0	0	0	1	0	0	2.50144
in	2010	5	2	0	2	0	0	2	0	0.75	3.13549
it	2010	0	0	0	0	0	0	1	0	0	3.04452
jp	2010	0	0	0	5	0	0	1	0.666667	0.333333	2.4681
ke	2010	31	19	3	7	1	0	2	0.983607	0.576159	0.905709
kh	2010	0	0	0	0	0	0	1	0	0	0.546544
kp	2010	0	0	0	0	0	0	3	0	0	-1.09861
kr	2010	0	0	0	0	0	0	1	0	0	1.88707
la	2010	0	0	0	0	0	0	3	0	0	0.587787
ml	2010	0	0	0	0	0	0	2	0	0	2.3979
mo	2010	0	0	1	0	1	0	2	1	0	1.1421
mw	2010	0	1	0	0	0	0	2	1	0	1.2852
mx	2010	0	0	0	0	0	0	1	0	0	2.00148
my	2010	0	0	0	0	0	0	2	0	0	2.16496
mz	2010	0	0	0	0	0	0	2	0	0	2.06142
na	2010	7	5	0	2	0	0	1	1	0.766667	1.60944
ng	2010	0	0	0	0	1	0	2	0	0	0.108214
nl	2010	0	0	0	1	0	0	1	0	0.5	2.87168
nz	2010	0	0	0	0	0	0	1	0	0.2	2.66259
ph	2010	0	0	0	0	0	0	2	0	0.166667	1.53393
pl	2010	0	0	0	0	0	0	1	0	1	2.05412
pt	2010	0	0	0	0	0	0	1	0	0	1.32687
qa	2010	0	0	0	0	0	0	1	0	0	1.84583
ru	2010	0	0	0	0	0	0	1	0	0	1.5506
rw	2010	0	0	0	0	0	0	3	0	0	-0.528067
sd	2010	0	0	0	0	0	0	2	0	0.95	0.566395
sg	2010	0	0	0	0	0	0	1	0	0	2.75154
sn	2010	0	0	0	0	0	0	1	0	0	1.67964
td	2010	0	0	0	0	0	0	3	0	0	0.725937
tg	2010	0	0	0	0	0	0	2	0	0	0.905709
th	2010	0	3	3	0	0	0	1	0	0.0833333	1.45225
tw	2010	0	0	0	0	0	0	3	0	0.4	-1.09861
tz	2010	4	7	4	2	0	0	2	0.0588235	0.75	1.81011
ug	2010	0	0	0	0	0	0	3	0	0.2	1.60944
us	2010	19	2	0	98	0	0	1	1	0.878788	2.25878
vn	2010	1	2	7	1	1	0	1	0.727273	0.666667	1.42139
za	2010	1	0	1	3	1	0	2	0.333333	0.37931	3.16407
zm	2010	6	11	1	1	2	1	2	0.666667	0.846154	1.1421
zw	2010	13	14	0	0	0	0	1	0.037037	0.527273	1.77307
ae	2011	0	0	0	0	0	0	1	0	0	1.41369
ao	2011	0	0	0	0	0	0	3	0	0	-1.09861
at	2011	0	0	0	0	0	0	1	0	0.5	2.97893
au	2011	4	7	0	35	0	0	1	1	0	2.25878
be	2011	2	2	0	45	4	0	1	1	0.783784	2.36085
bi	2011	0	0	0	0	0	0	3	0	0	0.322773
bj	2011	0	0	0	0	0	0	2	0	0	0.419854
bw	2011	4	10	1	0	0	0	2	1	0.684211	2.56495
ca	2011	0	0	0	0	0	0	1	0	0	3.19185
cd	2011	0	0	0	0	0	0	1	0	0.2	1.06289
cf	2011	0	0	0	0	0	0	3	0	0.666667	0.494696
cg	2011	0	3	0	3	1	0	2	0	0	1.49393
ch	2011	0	0	0	6	0	0	1	1	0.909091	2.65324
ci	2011	0	0	0	0	0	0	3	0	0	0.820981
cm	2011	1	4	1	0	1	0	1	0	0.5	0.716678
cn	2011	3	4	3	31	32	1	1	0.972222	0.890585	2.4681
de	2011	1	1	0	26	4	0	1	0.97561	0.833333	3.16407
dj	2011	0	0	0	0	0	0	3	0	0	-0.385662
dk	2011	0	0	0	0	0	0	1	0	0.6	3.13549
eg	2011	0	0	0	1	0	0	1	0	0	-0.465363
es	2011	0	0	0	0	0	0	1	0	0.923077	2.83321
et	2011	1	0	0	162	0	0	1	0.625767	0.00952381	1.76766
fr	2011	2	3	1	69	9	0	1	1	0.675676	3.10608
ga	2011	0	1	0	1	0	0	2	0	0.535714	1.21302
gb	2011	0	1	0	18	0	0	1	0.944444	0.296296	2.62467
gh	2011	0	0	0	0	0	0	3	0	0	1.74524
gn	2011	0	0	0	0	0	0	2	0	0	1.01693
gq	2011	0	0	0	0	0	0	1	0	0	-0.385662
hk	2011	2	0	2	31	4	0	1	1	0.101781	2.62467
id	2011	0	0	0	0	0	0	1	0	0	2.5337
in	2011	1	1	0	1	0	0	2	0	0.9	2.62467
it	2011	0	0	0	0	0	0	1	0	0	3.07577
jp	2011	0	0	1	1	0	0	1	0	0.277778	2.13163
ke	2011	30	21	7	11	1	0	2	0.9	0.5	0.947381
kh	2011	0	0	0	0	0	0	1	0	0	0.37949
kp	2011	0	0	0	0	0	0	3	0	0	-1.09861
kr	2011	0	1	0	0	0	0	1	0	0	1.5506
la	2011	0	0	0	0	0	0	3	0	0	0.251314
ml	2011	0	0	0	0	0	0	2	0	0	2.45674
mo	2011	0	0	0	0	0	0	2	0	0.5	1.01693
mw	2011	3	0	0	5	0	0	2	0.75	0.5	1.1421
mx	2011	0	0	0	0	0	0	1	0	0	2.05412
my	2011	0	0	4	0	0	0	2	1	0	2.19722
mz	2011	0	0	1	0	1	0	2	0	0	1.81011
na	2011	13	12	0	0	0	0	1	1	0.875	1.66501
ng	2011	2	3	0	1	0	0	2	0	0.0243902	0.0526437
nl	2011	0	0	0	0	0	0	1	0	0.5	2.36085
nz	2011	0	0	0	1	0	0	1	0	0	2.70805
ph	2011	0	0	0	0	0	0	2	0	0	1.5724
pl	2011	0	0	0	0	0	0	1	0	0	2.10413
pt	2011	0	0	0	0	0	0	1	0	0	1.36688
qa	2011	0	0	0	0	0	0	1	0	0	1.94591
ru	2011	0	0	0	0	0	0	1	0	0	1.60944
rw	2011	0	0	0	0	0	0	3	0	0	-0.578078
sd	2011	0	0	0	0	0	0	2	0	0	0.619039
sg	2011	0	0	0	0	0	0	1	0	0	2.79321
sn	2011	0	0	0	0	0	0	1	0	0	1.71298
td	2011	0	1	0	0	0	0	3	0	0	0.600774
tg	2011	0	0	0	0	0	0	2	0	0	1.26224
th	2011	0	0	3	0	0	0	1	0	0.4	1.49393
tw	2011	0	1	0	1	0	0	3	0	0	-1.09861
tz	2011	0	0	1	0	0	0	2	0	0.85	1.84583
ug	2011	1	2	0	8	1	0	3	0.909091	0	1.35812
us	2011	10	4	0	85	0	0	1	1	0.92	2.2882
vn	2011	0	3	6	1	0	0	1	0.5	0.55	1.48808
za	2011	2	1	1	2	1	1	2	0.857143	0.121951	3.19185
zm	2011	5	13	2	5	3	0	2	0.962963	0.954545	1.18377
zw	2011	6	12	0	0	0	0	1	0.777778	0.55102	2.09714

## Sheet: Variable Description
Variable	Description	Further details
ctry	Country	ISO code, also given in table S2
year	Year	From 1996 - 2011
sz.r1	Small raw ivory (<10kg)	Number of seizures in each ivory class
sz.r2	Medium raw ivory (10kg - <100kg)
sz.r3	Large raw ivory (100kg+)
sz.r4	Small worked ivory (<10kg)
sz.r5	Medium worked ivory (10kg - <100kg)
sz.r6	Large worked ivory (100kg+)
legis	Legislation score	CITES legislation score
dc	Data collection score	Proportion of seizures in the ivory class that were targeted/automated/prompted
LE1	LE ratio in previous year	Proportion of seizures implicating a country that the country made themselves in the previous year
rep.sc	CITES reporting score	Empirical logistic transformation of the proportion of years a country is a CITES Party and reports to CITES.
